# Supplementary material for: A citizen science approach to evaluating US cities for biotic homogenization
Source: PeerJ. 2019 Apr 30;7:e6879. doi: 10.7717/peerj.6879 (PMC6499060; doi:10.7717/peerj.6879)
Supplement: Supplemental Information 2 — Species are listed with their taxon group, common name, and scientific name in descending order of their number of observations (count). We also include what their relative rank is within their taxon group, along with the number of cities that species was observed in. [file peerj-07-6879-s002.xlsx]

## Sheet: big_over100obs_slopes.csv
taxon	common name	scientific name	count	rank	total cities
dicots	common dandelion	Taraxacum officinale	798	1	13
birds	Mallard	Anas platyrhynchos	704	1	13
birds	American Robin	Turdus migratorius	651	2	13
dicots	garlic mustard	Alliaria petiolata	636	2	7
insects	Western Honey Bee	Apis mellifera	605	1	12
birds	Canada Goose	Branta canadensis	523	3	12
dicots	Pinkladies	Oenothera speciosa	505	3	6
dicots	poison ivy	Toxicodendron radicans	501	4	9
mammals	Eastern Gray Squirrel	Sciurus carolinensis	498	1	10
reptiles	Western Fence Lizard	Sceloporus occidentalis	437	1	2
dicots	California poppy	Eschscholzia californica	433	5	4
birds	Rock Dove	Columba livia	390	4	14
monocots	eastern skunk cabbage	Symplocarpus foetidus	374	1	5
birds	House Sparrow	Passer domesticus	367	5	13
dicots	red deadnettle	Lamium purpureum	364	6	8
dicots	mayapple	Podophyllum peltatum	345	7	6
dicots	common mugwort	Artemisia vulgaris	335	8	6
mammals	Fox Squirrel	Sciurus niger	323	2	7
dicots	scarlet pimpernel	Anagallis arvensis	313	9	5
dicots	Japanese knotweed	Fallopia japonica	308	10	6
dicots	Virginia creeper	Parthenocissus quinquefolia	307	11	9
dicots	orange bush monkeyflower	Mimulus aurantiacus	295	12.5	2
dicots	common blue violet	Viola sororia	295	12.5	7
dicots	English ivy	Hedera helix	291	14	11
dicots	common yarrow	Achillea millefolium	287	15	12
dicots	Pacific poison oak	Toxicodendron diversilobum	276	16	3
birds	Mourning Dove	Zenaida macroura	267	6	13
dicots	white clover	Trifolium repens	260	17	12
dicots	miner's lettuce	Claytonia perfoliata	257	18	3
dicots	Virginia bluebells	Mertensia virginica	253	19	4
monocots	western blue-eyed grass	Sisyrinchium bellum	248	2	2
insects	Seven-spotted Ladybug	Coccinella septempunctata	246	2	12
dicots	Indian blanket	Gaillardia pulchella	246	20	3
dicots	eastern redbud	Cercis canadensis	245	21	9
dicots	Japanese honeysuckle	Lonicera japonica	243	22	8
birds	Northern Cardinal	Cardinalis cardinalis	240	7	10
dicots	Texas Bluebonnet	Lupinus texensis	217	23	3
birds	European Starling	Sturnus vulgaris	213	8	11
dicots	lesser celandine	Ficaria verna	213	24	5
dicots	Dakota mock vervain	Glandularia bipinnatifida	201	25	3
birds	Red-winged Blackbird	Agelaius phoeniceus	200	9	13
dicots	green antelopehorns	Asclepias viridis	197	26.5	3
dicots	catchweed bedstraw	Galium aparine	197	26.5	12
gastropods	Garden Snail	Cornu aspersum	190	1	6
dicots	tulip tree	Liriodendron tulipifera	181	28	5
reptiles	Green Anole	Anolis carolinensis	178	2	5
dicots	Virginia spring beauty	Claytonia virginica	178	29	4
reptiles	Red-eared Slider	Trachemys scripta elegans	168	3	10
dicots	flowering dogwood	Cornus florida	168	30	5
dicots	American jumpseed	Persicaria virginiana	167	31	4
birds	Northern Mockingbird	Mimus polyglottos	166	10	10
dicots	American sweetgum	Liquidambar styraciflua	166	32	8
dicots	Bermuda buttercup	Oxalis pes-caprae	165	33.5	2
dicots	wild radish	Raphanus sativus	165	33.5	3
dicots	ground ivy	Glechoma hederacea	164	35	7
conifers	eastern white pine	Pinus strobus	164	1	6
insects	Monarch	Danaus plexippus	159	3	8
dicots	straggler daisy	Calyptocarpus vialis	159	36	3
birds	Wild Turkey	Meleagris gallopavo	157	11	8
dicots	Engelmann Daisy	Engelmannia peristenia	157	37.5	3
dicots	bloodroot	Sanguinaria canadensis	157	37.5	6
dicots	henbit deadnettle	Lamium amplexicaule	154	39	11
amphibians	Eastern Red-backed Salamander	Plethodon cinereus	150	1	3
dicots	boxelder maple	Acer negundo	148	40.5	11
dicots	coyote brush	Baccharis pilularis	148	40.5	2
dicots	Field madder	Sherardia arvensis	147	42	7
dicots	antelope horns	Asclepias asperula	144	43	2
dicots	trailing blackberry	Rubus ursinus	141	44	3
ferns	western sword fern	Polystichum munitum	141	1	2
birds	Great-tailed Grackle	Quiscalus mexicanus	140	12	6
mammals	Eastern Cottontail	Sylvilagus floridanus	139	3	10
birds	Blue Jay	Cyanocitta cristata	138	13	10
dicots	California sagebrush	Artemisia californica	138	45	2
monocots	Siberian squill	Othocallis siberica	136	3	4
insects	Asian Lady Beetle	Harmonia axyridis	133	4.5	13
insects	Convergent Lady Beetle	Hippodamia convergens	133	4.5	6
dicots	ribwort plantain	Plantago lanceolata	133	46	11
ferns	Christmas fern	Polystichum acrostichoides	130	2	4
dicots	multiflora rose	Rosa multiflora	129	47	6
dicots	giant ragweed	Ambrosia trifida	128	48	3
dicots	California bee plant	Scrophularia californica	127	49	2
birds	Great Blue Heron	Ardea herodias	126	14	13
conifers	eastern redcedar	Juniperus virginiana	124	2	9
dicots	coast live oak	Quercus agrifolia	123	50	3
mammals	White-tailed Deer	Odocoileus virginianus	122	4	9
dicots	common stork's-bill	Erodium cicutarium	121	51	10
dicots	American sycamore	Platanus occidentalis	120	52	8
dicots	Shepherd's-purse	Capsella bursa-pastoris	117	53.5	9
dicots	pineapple-weed	Matricaria discoidea	117	53.5	4
dicots	American beech	Fagus grandifolia	116	56	4
dicots	common hedge parsley	Torilis arvensis	116	56	4
dicots	Texas Vervain	Verbena halei	116	56	3
monocots	saw greenbrier	Smilax bona-nox	116	4	5
dicots	Texas Prairie Parsley	Polytaenia texana	115	58.5	3
dicots	Common Vetch	Vicia sativa	115	58.5	7
gastropods	Milk Snail	Otala lactea	113	2	4
dicots	Italian thistle	Carduus pycnocephalus	113	60.5	2
dicots	Texas Paintbrush	Castilleja indivisa	113	60.5	3
dicots	California bay	Umbellularia californica	112	62	2
monocots	Blue Dicks	Dichelostemma capitatum	112	5	2
monocots	Douglas iris	Iris douglasiana	110	6	1
monocots	Jack-in-the-pulpit	Arisaema triphyllum	109	7	5
dicots	common daisy	Bellis perennis	108	63	3
monocots	yellow trout lily	Erythronium americanum	108	8	4
ferns	common bracken	Pteridium aquilinum	108	3	4
birds	American Crow	Corvus brachyrhynchos	107	15	14
dicots	Toyon	Heteromeles arbutifolia	107	64.5	2
dicots	American holly	Ilex opaca	107	64.5	7
dicots	winecup mallow	Callirhoe involucrata	106	66.5	3
dicots	bird's-eye speedwell	Veronica persica	106	66.5	11
dicots	upright prairie coneflower	Ratibida columnifera	105	68	3
dicots	common cowparsnip	Heracleum maximum	102	69	2
birds	Dark-eyed Junco	Junco hyemalis	101	16	5
dicots	lesser periwinkle	Vinca minor	101	70	7
monocots	Canada mayflower	Maianthemum canadense	101	9	3
